# Supplementary material for: Single-cell RNA landscape of intratumoral heterogeneity and immunosuppressive microenvironment in advanced osteosarcoma
Source: PubMed Central journal article supplement (PMC7730477; doi:10.1038/s41467-020-20059-6), 2020-12-10
Supplement: 41467_2020_20059_MOESM3_ESM.pdf [file 41467_2020_20059_MOESM3_ESM.pdf]

## **Description of Additional Supplementary Files**

File name: Supplementary Data 1

Description: The top 20 differentially expressed genes of the osteoblastic OS subclusters. The “pct.1” and “pct.2” refer to the percent of cells (%) that are positive for the indicated genes among all cells in the subjected subcluster and the other subclusters beyond, respectively. The “avg\_logFC” refers to the log fold-change of the average gene expression levels between the subjected cell subcluster and the other subclusters, while the “p\_val” refers to the Wilcoxon Rank Sum test results (two-sided test) and “p\_val\_adj” is the corresponding Bonferroni-corrected “p\_value”.

File name: Supplementary Data 2

Description: The top 20 differentially expressed genes of the chondroblastic OS subclusters. The “pct.1” and “pct.2” refer to the percent of cells (%) that are positive for the indicated genes among all cells in the subjected subcluster and the other subclusters beyond, respectively. The “avg\_logFC” refers to the log fold-change of the average gene expression levels between the subjected cell subcluster and the other subclusters, while the “p\_val” refers to the Wilcoxon Rank Sum test results (two-sided test) and “p\_val\_adj” is the corresponding Bonferroni-corrected “p\_value”.

File name: Supplementary Data 3

Description: The top 20 differentially expressed genes of the osteoclast subclusters. The “pct.1” and “pct.2” refer to the percent of cells (%) that are positive for the indicated genes among all cells in the subjected subcluster and the other subclusters beyond, respectively. The “avg\_logFC” refers to the log fold-change of the average gene expression levels between the subjected cell subcluster and the other subclusters, while the “p\_val” refers to the

Wilcoxon Rank Sum test results (two-sided test) and “p\_val\_adj” is the corresponding Bonferroni-corrected “p\_value”.

File name: Supplementary Data 4

Description: The top 20 differentially expressed genes of the MSC subclusters. The “pct.1” and “pct.2” refer to the percent of cells (%) that are positive for the indicated genes among all cells in the subjected subcluster and the other subclusters beyond, respectively. The “avg\_logFC” refers to the log fold-change of the average gene expression levels between the subjected cell subcluster and the other subclusters, while the “p\_val” refers to the Wilcoxon Rank Sum test results (two-sided test) and “p\_val\_adj” is the corresponding Bonferroni-corrected “p\_value”.

File name: Supplementary Data 5

Description: The top 20 differentially expressed genes of the fibroblast subclusters. The “pct.1” and “pct.2” refer to the percent of cells (%) that are positive for the indicated genes among all cells in the subjected subcluster and the other subclusters beyond, respectively. The “avg\_logFC” refers to the log fold-change of the average gene expression levels between the subjected cell subcluster and the other subclusters, while the “p\_val” refers to the Wilcoxon Rank Sum test results (two-sided test) and “p\_val\_adj” is the corresponding Bonferroni-corrected “p\_value”.

File name: Supplementary Data 6

Description: The top 20 differentially expressed genes of the myeloid cell subclusters. The “pct.1” and “pct.2” refer to the percent of cells (%) that are positive for the indicated genes among all cells in the subjected subcluster and the other subclusters beyond, respectively.

The “avg\_logFC” refers to the log fold-change of the average gene expression levels between the subjected cell subcluster and the other subclusters, while the “p\_val” refers to the Wilcoxon Rank Sum test results (two-sided test) and “p\_val\_adj” is the corresponding Bonferroni-corrected “p\_value”.

File name: Supplementary Data 7

Description: The top 20 differentially expressed genes of the T&NK subclusters. The “pct.1” and “pct.2” refer to the percent of cells (%) that are positive for the indicated genes among all cells in the subjected subcluster and the other subclusters beyond, respectively. The “avg\_logFC” refers to the log fold-change of the average gene expression levels between the subjected cell subcluster and the other subclusters, while the “p\_val” refers to the Wilcoxon Rank Sum test results (two-sided test) and “p\_val\_adj” is the corresponding Bonferroni-corrected “p\_value”.
